# Supplementary material for: A high-performance battery–supercapacitor hybrid device and electrocatalytic oxygen evolution reaction based on NiCo2−xMnxO4@Ni-MOF ternary metal oxide core–shell structures
Source: Royal Society of Chemistry journal article supplement (doi:10.1039/d4ta02978j), 2024-01-01
Supplement: d4ta02978j1.pdf [file d4ta02978j1.pdf]

# Supplementary Materials

## High-Performance Battery-Supercapacitor Hybrid Device and Electrocatalytic Oxygen Evolution Reaction Based on $\text{NiCo}_{2-x}\text{Mn}_x\text{O}_4@$ Ni-MOF Ternary Metal Oxide Core- Shell Structures

*Suprimkumar D. Dhas<sup>1</sup>, Avinash C. Mendhe<sup>1</sup>, Pragati N. Thonge<sup>1,2</sup>, Amar M. Patil<sup>3</sup>, Youngsu Kim<sup>1</sup>, Daewon Kim<sup>1\*</sup>*

<sup>1</sup>Department of Electronic Engineering, Institute for Wearable Convergence Electronics, Kyung Hee University, 1732 Deogyong-daero, Giheung-gu, Yongin 17104, Republic of Korea

<sup>2</sup>Department of Botany, Punyashlok Ahilyadevi Holkar, Solapur University, Solapur, Maharashtra 416 004, India

<sup>3</sup>Energy Conversion Engineering Laboratory, Institute of Regional Innovation (IRI), Hirosaki University, Japan

\*Corresponding author: **Professor Daewon Kim**

**Email address:** daewon@khu.ac.kr

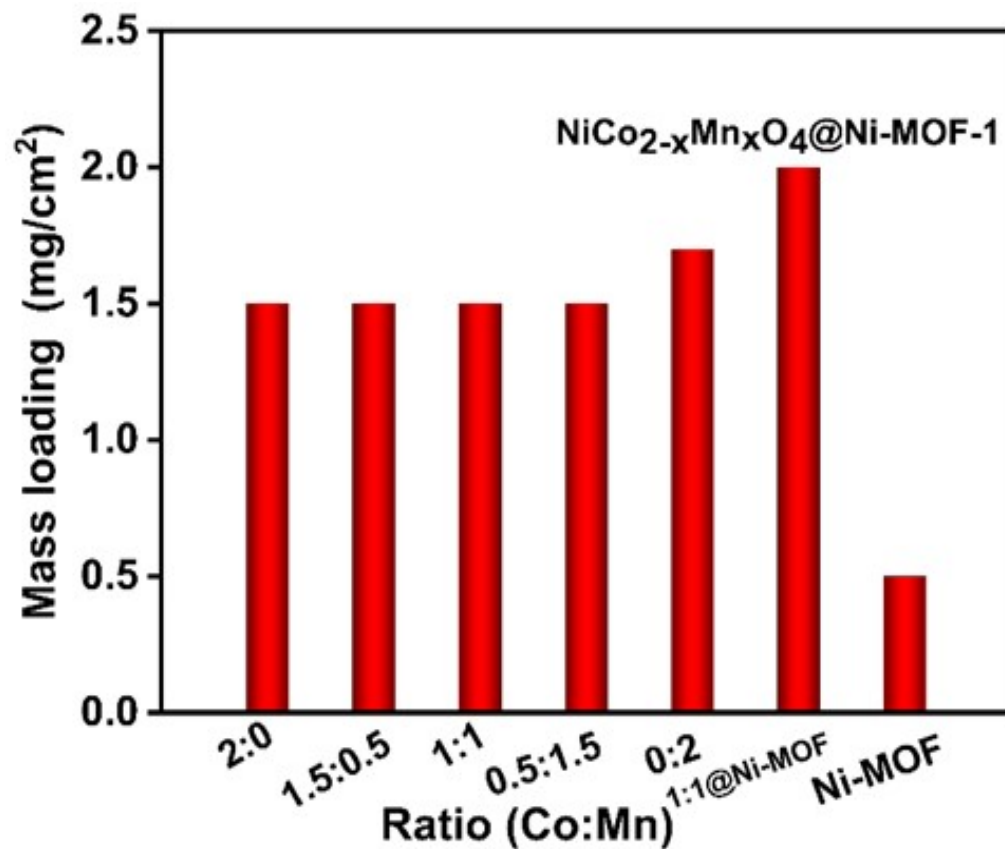

Fig. S1: Bar chart of the mass loading of each NiCo<sub>2-x</sub>Mn<sub>x</sub>O<sub>4</sub>-based materials

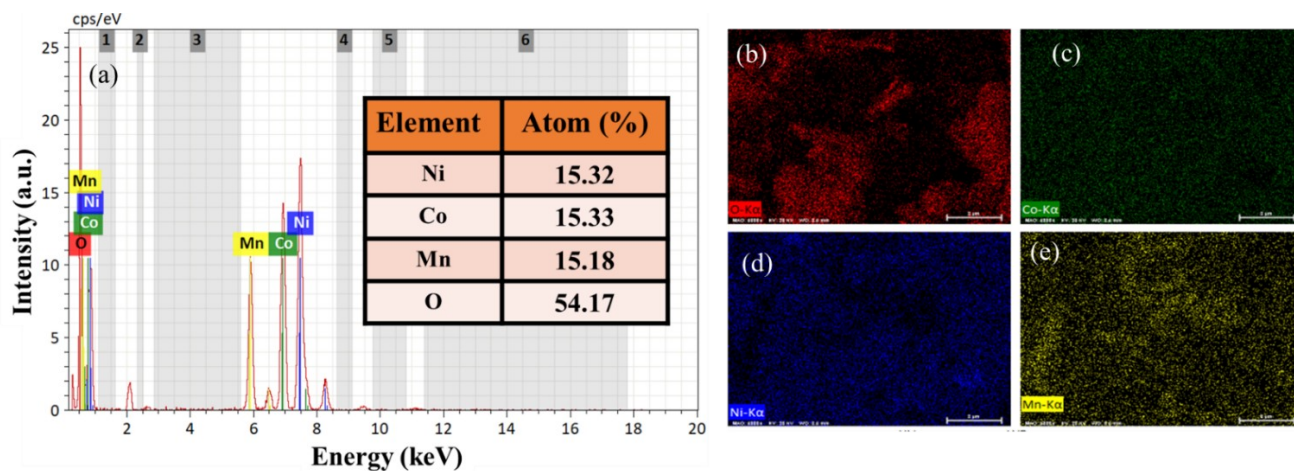

Fig. S2: (a) EDS spectra NiCo<sub>2-x</sub>Mn<sub>x</sub>O<sub>4</sub>-1 and corresponding element mapping (b) O, (c) Co, (d) Ni, (e) Mn.

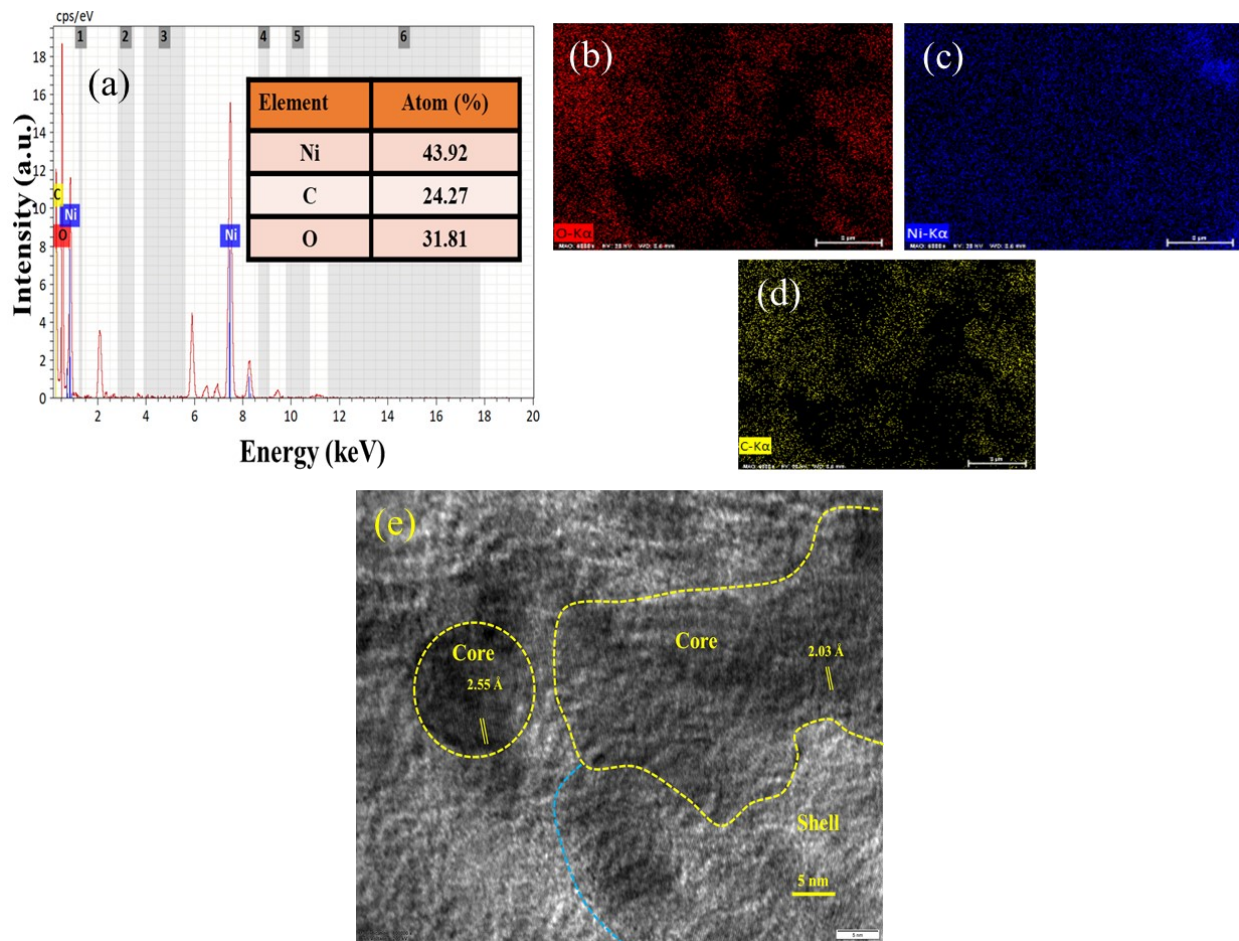

**Fig. S3:** (a) EDS spectra Ni-MOF and corresponding element mapping (b) O, (c) Ni, (d) C and (e) HR-TEM images of  $\text{NiCo}_{2-x}\text{Mn}_x\text{O}_4@\text{Ni-MOF-1}$  electrode.

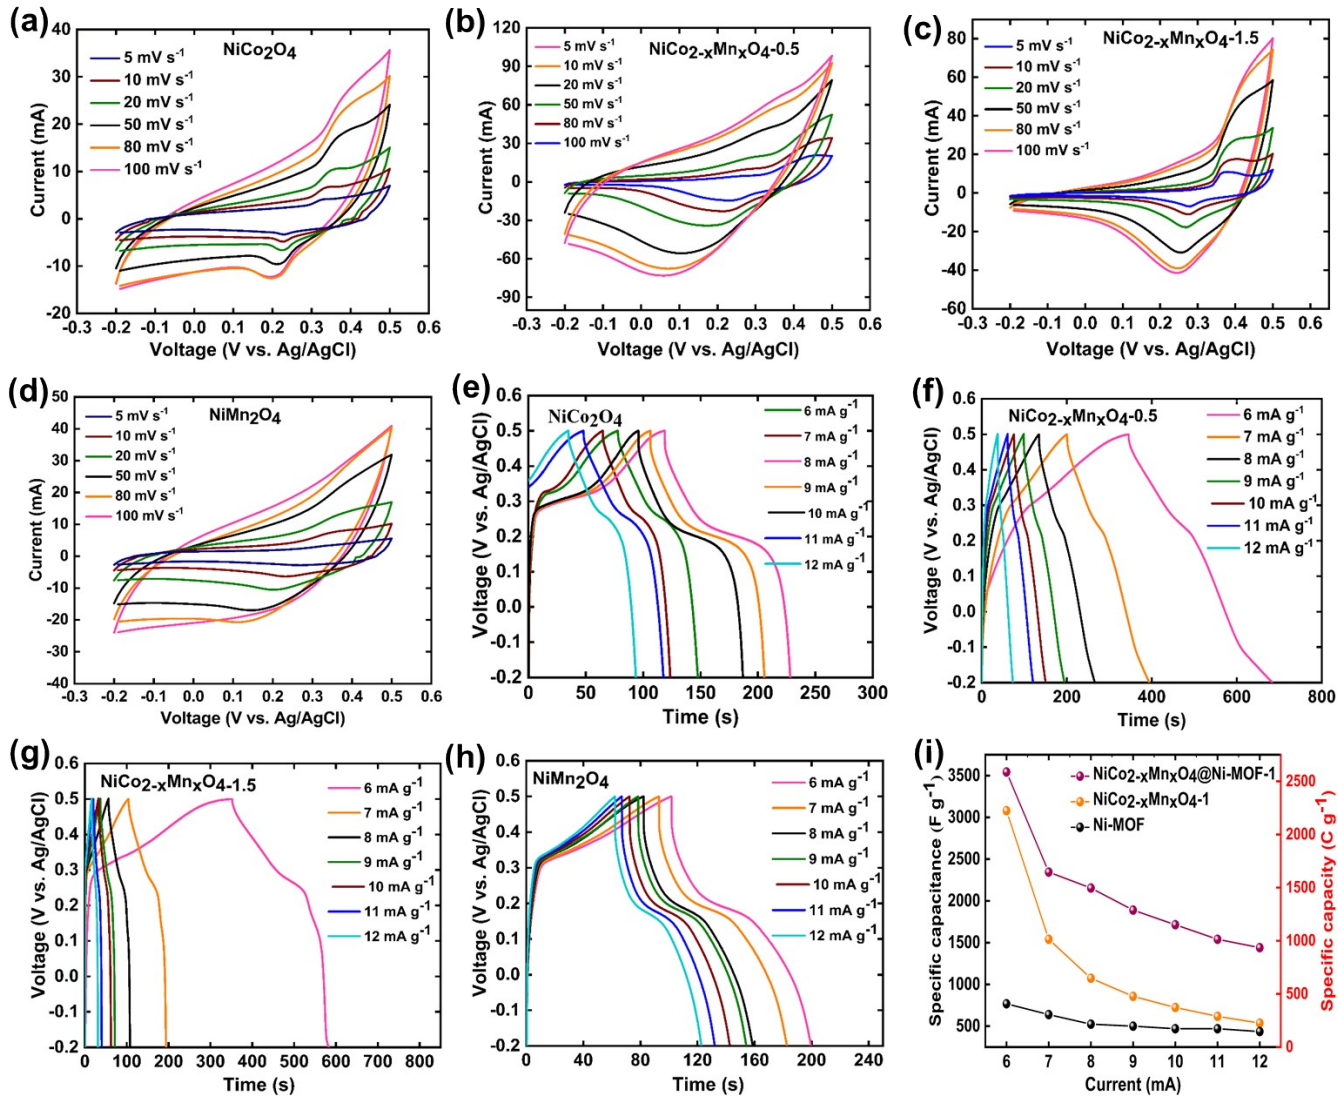

**Fig. S4:** CV curves of (a)  $\text{NiCo}_2\text{O}_4$ , (b)  $\text{NiCo}_{2-x}\text{Mn}_x\text{O}_{4-0.5}$  (c)  $\text{NiCo}_{2-x}\text{Mn}_x\text{O}_{4-1.5}$  and (d)  $\text{NiMn}_2\text{O}_4$ , electrodes at various scan rate 5-100  $\text{mV/s}$ . GCD curves of (e)  $\text{NiCo}_2\text{O}_4$ , (f)  $\text{NiCo}_{2-x}\text{Mn}_x\text{O}_{4-0.5}$  (g)  $\text{NiCo}_{2-x}\text{Mn}_x\text{O}_{4-1.5}$  and (h)  $\text{NiMn}_2\text{O}_4$ , electrodes at various current densities. (i) Specific capacitance/capacity vs current densities.

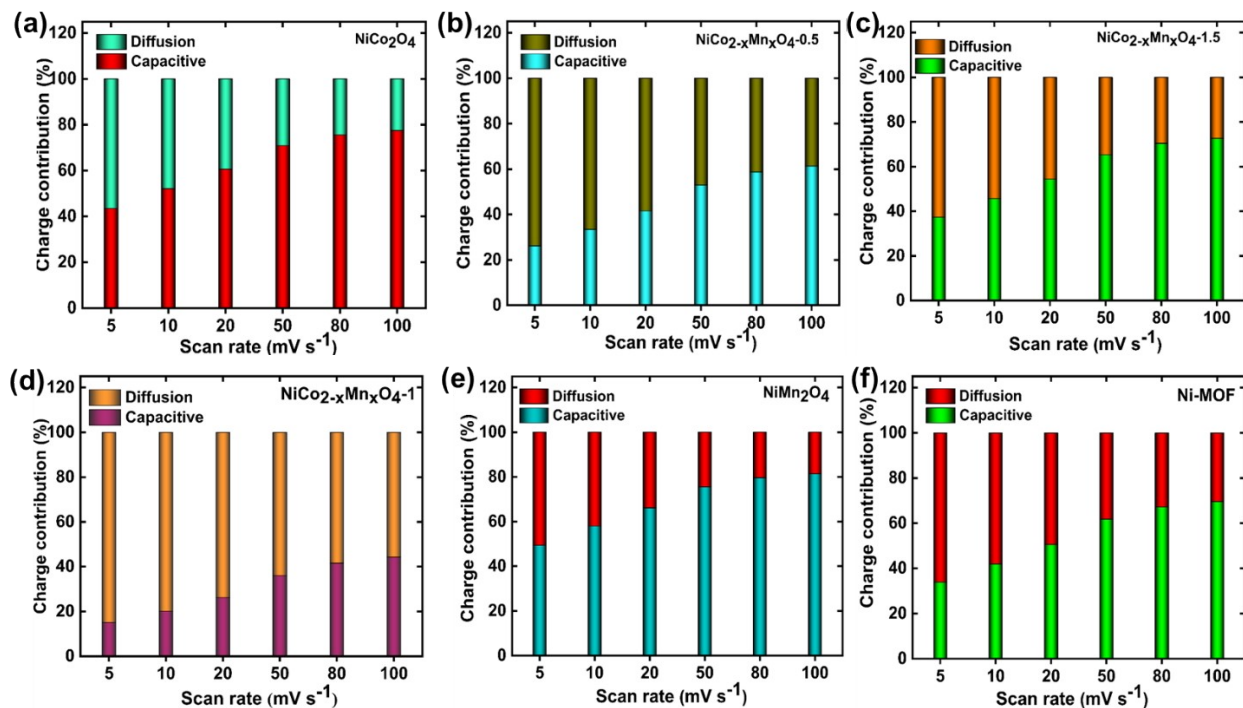

**Fig. S5:** Capacitive and diffusion-current contributions of (a)  $\text{NiCo}_2\text{O}_4$ , (b)  $\text{NiCo}_{2-x}\text{Mn}_x\text{O}_4-0.5$  (c)  $\text{NiCo}_{2-x}\text{Mn}_x\text{O}_4-1.5$ , (d)  $\text{NiCo}_{2-x}\text{Mn}_x\text{O}_4-1$ , (d)  $\text{NiMn}_2\text{O}_4$  and (f) pristine Ni-MOF electrodes at various scan rates.

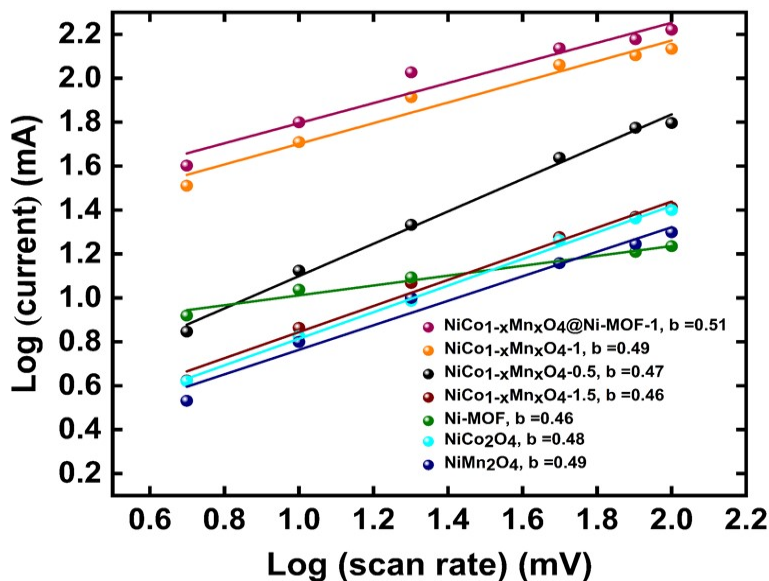

**Fig. S6:** The b-value determination of the peak anodic currents of  $\text{NiCo}_{2-x}\text{Mn}_x\text{O}_4$ -based electrodes.



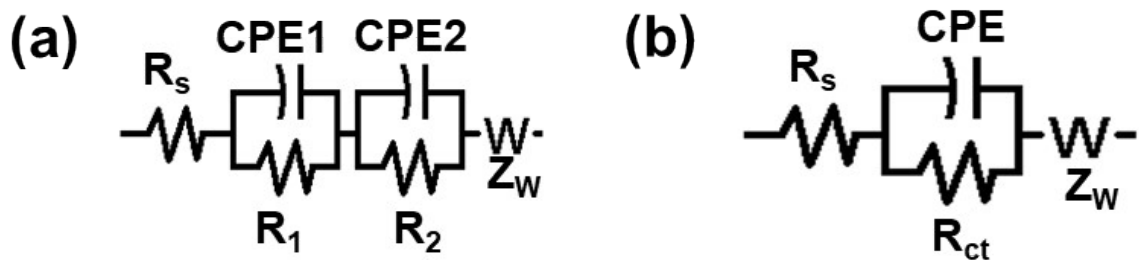

**Fig. S7:** The equivalent circuit fitted with (a)  $\text{NiCo}_{2-x}\text{Mn}_x\text{O}_4$ -1,  $\text{NiCo}_{2-x}\text{Mn}_x\text{O}_4$ -0.5 and (b)  $\text{NiCo}_{2-x}\text{Mn}_x\text{O}_4$ -1.5, Ni-MOF,  $\text{NiCo}_2\text{O}_4$  and  $\text{NiMn}_2\text{O}_4$  electrodes.

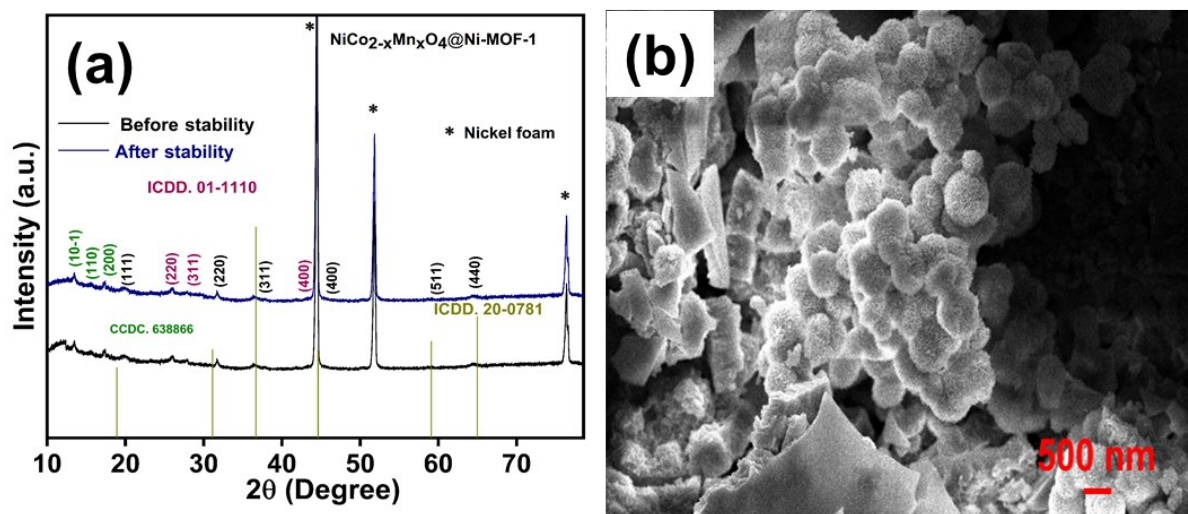

**Fig. S8:** (a) XRD patterns before and after stability of  $\text{NiCo}_{2-x}\text{Mn}_x\text{O}_4@$ Ni-MOF-1 and (b) FE-SEM image after stability of  $\text{NiCo}_{2-x}\text{Mn}_x\text{O}_4@$ Ni-MOF-1 electrode.

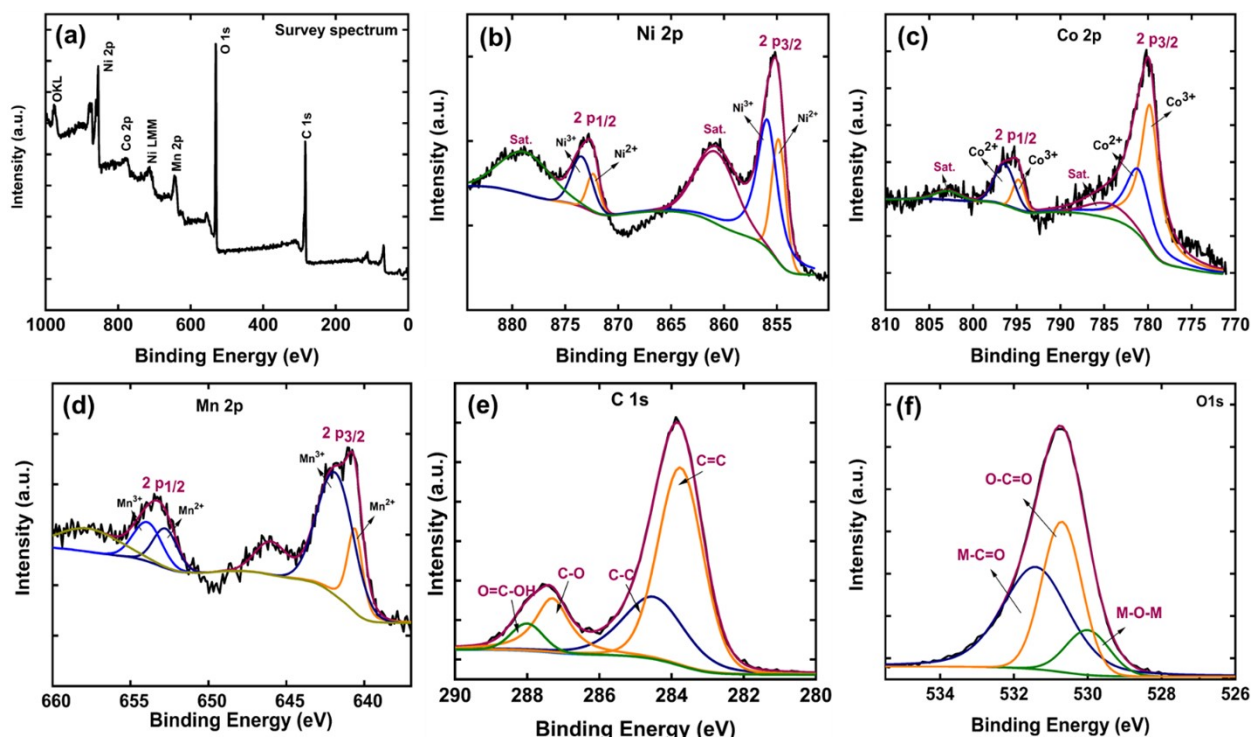

**Fig. S9:** (a) XPS survey spectrum, after stability of  $\text{NiCo}_{2-x}\text{Mn}_x\text{O}_4@\text{Ni-MOF-1}$ , high-resolution XPS spectra of (b) Ni 2p, (c) Co 2p, (d) Mn 2p, (e) C 1s and (f) O 1s of the after stability of  $\text{NiCo}_{2-x}\text{Mn}_x\text{O}_4@\text{Ni-MOF-1}$ .

| Sr. No. | Material based on Ni, Co, Mn, oxides                                | Method of preparation | Morphology          | Electrolyte | Specific capacitance Cs (F/g)       | Retention % After Cycles | Ref.                                                  |
|---------|---------------------------------------------------------------------|-----------------------|---------------------|-------------|-------------------------------------|--------------------------|-------------------------------------------------------|
| 1.      | NiCo <sub>2</sub> O <sub>4</sub> @Ni-MOF                            | Hydrothermal          | Nanowires           | 2 M KOH     | 208.8 mAh/g (2 mA/cm <sup>2</sup> ) | -                        | ACS Appl. Mater. Interfaces 2019, 11, 41, 37675–37684 |
| 2.      | NiCo <sub>2</sub> O <sub>4</sub> /rGO                               | Ultrasonic spraying   | laminated structure | 2 M KOH     | 871 (1 A/g)                         | 134/30000                | J. mater. sci. technol. 99 (2022) 260–269             |
| 3.      | NiCo <sub>2</sub> O <sub>4</sub> @MnO <sub>2</sub>                  | Electrodeposition     | nanosheets          | 1 M KOH     | 913.6 (0.5 A/g)                     | 87.1/3000                | J. Mater. Chem. A, 2014,2, 4795-4802                  |
| 4.      | CQD/NiCo <sub>2</sub> O <sub>4</sub>                                | reflux                | sphere              | 2 M KOH     | 856 (1 A/g)                         | 98.7/ 10000              | J. Mater. Chem. A. 3 (2015) 866–877.                  |
| 5.      | CNT/NiCo <sub>2</sub> O <sub>4</sub>                                | Electrodeposition     | Nanosheets          | 6 M KOH     | 695 (1 A/g)                         | 91/1500                  | J. Mater. Chem. A, 2017,5, 5886-5894                  |
| 6.      | C@NiCo <sub>2</sub> O <sub>4</sub>                                  | Hydrothermal          | microsphere         | 6 M KOH     | 404 (1 A/g)                         | 87.1/ 1000               | J. Alloys Compd.749, 2018, 305-312                    |
| 7.      | NiCo <sub>2</sub> O <sub>4</sub> @Ni foam                           | Combustion            | honeycomb-like      | 2 M KOH     | 646.6 (1 A/g)                       | 96.5/ 3000               | Electrochim. Acta 224 (2017) 378–385                  |
| 8.      | NiCo <sub>2</sub> O <sub>4</sub> -ECN                               | Hydrothermal          | Nanoflowers         | 6 M KOH     | 596.8 (2 A/g)                       | 97/3100                  | Electrochim. Acta 1 (2017), 288-295                   |
| 9.      | MWCNT/GO/NiCo <sub>2</sub> O <sub>4</sub>                           | Hydrothermal          | Nanocrystalline     | 6 M KOH     | 707 (2.5 A/g)                       | 88/5000                  | J. Alloys Compd,765 (2018), 369-379                   |
| 10.     | NiCo <sub>2</sub> O <sub>4</sub> @rGO                               | Hydrothermal          | nanoneedles         | 2 M KOH     | 1427 (8 A/g)                        | 83.8/10000               | J. Mater. Chem. A, 2018,6, 22106-22114                |
| 11.     | CNF@ NiCo <sub>2</sub> O                                            | Co-precipitation      | Nanosheets          | 2 M KOH     | 902 (2 A/g)                         | 96.4/2400                | Sci. Rep. 3 (1) (2013) 1470.                          |
| 12.     | NiMn <sub>2</sub> O <sub>4</sub> @rGO                               | Hydrothermal          | nanoneedless        | 6 M KOH     | 882 (1 A/g)                         | 93.8/5000                | Environ. Sci.: Nano, 2020,7, 198-209                  |
| 13.     | PANI- NiMn <sub>2</sub> O <sub>4</sub>                              | Combustion            | Nanospheres         | 1 M KOH     | 442                                 | 96/1000                  | Mater. Sci. Eng. B. 294 (2023) 116553                 |
| 14.     | NiMn <sub>2</sub> O <sub>4</sub> /3DPNG                             | In-situ               | Nanocrystals        | 6 mol/L KOH | 1308.2                              | 91.6 %/ 10000            | Appl. Surf. Sci. 507, 2020, 145065                    |
| 15.     | NiCo <sub>2</sub> O <sub>4</sub> @ NiMn <sub>2</sub> O <sub>4</sub> | Hydrothermal          | nanoneedle arrays   | 3 M KOH     | 539.2                               | 93/5000                  | Ceram. Int.45, 2019, 16904-16910                      |
| 16.     | CoFe <sub>2</sub> O <sub>4</sub> @ NiMn <sub>2</sub> O <sub>4</sub> | Hydrothermal          | Nanospheres         | 1 M KOH     | 353.6 mAh/g                         | 88.4/10000               | J. Alloys Compd. 959, 2023, 170483                    |
|         | EGNMO/EGNMO                                                         | Hydrothermal          | Quasi-              |             | 17571 1436.61                       |                          | Electrochim. Acta                                     |



|     |                                                              |              |                  |                                     |       |            |                                                     |
|-----|--------------------------------------------------------------|--------------|------------------|-------------------------------------|-------|------------|-----------------------------------------------------|
|     | [NMO]                                                        |              | spherical-sheet  |                                     | [194] |            | 216, 2016, 386-396                                  |
| 18. | FeVO <sub>4</sub>    NiMn <sub>2</sub> O <sub>4</sub>        | Combustion   | Polyhedral shape | 1 M Na <sub>2</sub> SO <sub>4</sub> | 202   | 91/15000   | RSC Advances. 5 (2015) 27649–27656.                 |
| 19. | NiMn <sub>2</sub> O <sub>4</sub> @CoS                        | Hydrothermal | Nano-flakes      | 1 M KOH                             | 1751  | 94/5000    | ACS Sustainable Chem. Eng. 2018, 6, 12, 16933–16940 |
| 20. | NiCo <sub>2-x</sub> Mn <sub>x</sub> O <sub>4</sub> @Ni-MOF-1 | Hydrothermal | Nanoflowers      | 2 M KOH                             | 3543  | 93.7/15000 | <b>This Work</b>                                    |

**Table S1:** Capacitive performance comparison of some nickel, cobalt, manganese based metal oxides and Ni-MOF based electrodes.

The possible reaction mechanism for OER over NiCo<sub>2-x</sub>Mn<sub>x</sub>O<sub>4</sub>-based electrode:

**Hydroxide ion adsorption:**

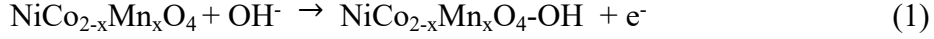

**Oxidation to oxide species:**

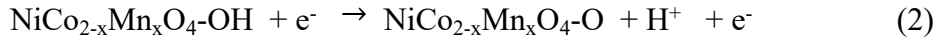

**Formation of peroxide intermediate:**

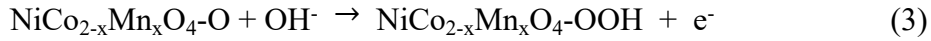

**Formation and release of oxygen:**

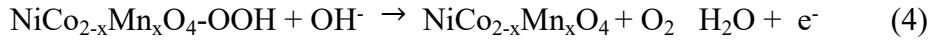

This proposed mechanism highlights the steps involved in the OER process on a NiCo<sub>2-x</sub>Mn<sub>x</sub>O<sub>4</sub>-based electrocatalyst, emphasizing the role of each component in facilitating the reaction.

| <b>Sr. No.</b> | <b>Catalyst</b>                                              | <b>Overpotential (<math>\eta</math>)<br/>(mV)<br/>@ 10 mA cm<sup>-2</sup></b> | <b>Tafel slope<br/>(mV dec<sup>-1</sup>)</b> | <b>Mass-based specific<br/>activity<br/>at <math>\eta = 0.35</math> V (A g<sup>-1</sup>)</b> |
|----------------|--------------------------------------------------------------|-------------------------------------------------------------------------------|----------------------------------------------|----------------------------------------------------------------------------------------------|
| 1.             | NiMn <sub>2</sub> O <sub>4</sub>                             | 662 ± 9                                                                       | 298.3 ± 0.001                                | 0.93                                                                                         |
| 2.             | NiCo <sub>2</sub> O <sub>4</sub>                             | 628 ± 7                                                                       | 272.3 ± 0.008                                | 1.2                                                                                          |
| 3.             | NiCo <sub>2-x</sub> Mn <sub>x</sub> O <sub>4</sub> -1.5      | 542 ± 6                                                                       | 265.9 ± 0.00514                              | 1.3                                                                                          |
| 4.             | RuO <sub>2</sub>                                             | 467 ± 6                                                                       | 224.4 ± 0.009                                | 3.5                                                                                          |
| 5.             | NiCo <sub>2-x</sub> Mn <sub>x</sub> O <sub>4</sub> -0.5      | 456 ± 7                                                                       | 189.4 ± 0.0022                               | 2.1                                                                                          |
| 6.             | NiCo <sub>2-x</sub> Mn <sub>x</sub> O <sub>4</sub> -1        | 393 ± 6                                                                       | 178.1 ± 0.009                                | 5.8                                                                                          |
| 7.             | NiCo <sub>2-x</sub> Mn <sub>x</sub> O <sub>4</sub> @Ni-MOF-1 | 296 ± 5                                                                       | 131 ± 0.001                                  | 8.4                                                                                          |

**Table S2:** Comparative summarized data such as catalyst used, overpotential, Tafel slope with error bar and mass-based specific activity at  $\eta = 0.35$  V.

| Sr. No. | Catalyst                                                                 | Tafel slope (mV dec <sup>-1</sup> ) | Overpotential (mV) @ 10 mA cm <sup>-2</sup> | Ref.                                           |
|---------|--------------------------------------------------------------------------|-------------------------------------|---------------------------------------------|------------------------------------------------|
| 1.      | NiCo-LDH/NiCoPi                                                          | 73                                  | 300                                         | GEE 9 (2024) 1151e1158                         |
| 2.      | NiCo-LDH                                                                 | 123                                 | 410                                         | J. Colloid Interface Sci. 604 (2021) 832–843   |
| 3.      | Ni <sub>0.77</sub> Rh <sub>0.23</sub> O <sub>y</sub>                     | 53.7                                | 310                                         | J. Alloys Compd. 836 (2020) 155309             |
| 4.      | NiCoO <sub>2</sub> /CNTs                                                 | 156                                 | 460                                         | Electrochim. Acta. 252 (2017) 338–349          |
| 5.      | NiCoO <sub>2</sub> @CFP                                                  | 57                                  | 303                                         | Electrochim. Acta. 174 (2019) 246–253          |
| 6.      | NiCoO <sub>x</sub>                                                       | N/A                                 | 420                                         | J. Mater. Chem. A, 2021, 9, 8576-8585          |
| 7.      | Ir-doped NiCo <sub>2</sub> O <sub>4</sub>                                | 71                                  | 340                                         | Applied Catalysis A, General 626 (2021) 118377 |
| 8.      | PtCoNi/GNR                                                               | 76                                  | 350                                         | J. Mater. Chem. A, 2020, 8, 17691–17705        |
| 9.      | Co <sub>3</sub> O <sub>4</sub> -NiCo <sub>2</sub> O <sub>4</sub> /N-rGO  | 124                                 | 390                                         | Energy and Fuels 2021, 35, 4550.               |
| 10.     | NiCo <sub>2</sub> O <sub>4</sub> /NCNTs/NiCo                             | 89                                  | 350                                         | Chem. Eng. J. 2021, 408, 127814.               |
| 11.     | NiCo <sub>2</sub> O <sub>4</sub> /CoNC-NS                                | 90.8                                | 352                                         | Int. J. Hydrogen Energy 2023, 48, 13452.       |
| 12.     | NiCo-LDH                                                                 | 64                                  | 307                                         | Carbon 110 (2019) 1e7                          |
| 13.     | Co <sub>3</sub> O <sub>4</sub> -350°C                                    | 55                                  | 447                                         | ChemistrySelect 2019, 4, 1131.                 |
| 14.     | CoNi <sub>20</sub> -MOFNs@MX                                             | 61.6                                | 379                                         | ChemNanoMat., 2021, 7, 539.                    |
| 15.     | NiCo <sub>2</sub> O <sub>4</sub> (CH <sub>3</sub> OH)                    | 45.7                                | 380                                         | ChemElectroChem 2019, 6, 4429.                 |
| 16.     | 1% P-NiCo <sub>2</sub> O <sub>4</sub>                                    | 95                                  | 370                                         | Nanomaterials 2020, 10, 1.                     |
| 17.     | Ni <sub>0.75</sub> Cu <sub>0.25</sub> Co <sub>2</sub> O <sub>4</sub> /GF | 119                                 | 509                                         | Appl. Catal. B Environ. 2021, 291, 120065.     |
| 18.     | NiCo <sub>2</sub> O <sub>4</sub>                                         | 94.63                               | 400                                         | RSC Adv.,2023,13,23547                         |
| 19.     | NiCo <sub>2</sub> O <sub>4</sub> /MXene                                  | 64.63                               | 360                                         | ChemCatChem 2024,16, e2023012                  |
| 20.     | NiCo <sub>2-x</sub> Mn <sub>x</sub> O <sub>4</sub> @Ni-MOF-1             | 131                                 | 296                                         | <b>This Work</b>                               |

**Table S3:** Comparison of OER performance Ni, Mn, Co, oxide based electrocatalysts in alkaline media with recently reported works.
